# Supplementary material for: Bimetallic Ni–Pt nanoparticles immobilized on mesoporous N-doped carbon as a highly efficient catalyst for complete hydrogen evolution from hydrazine borane
Source: Royal Society of Chemistry journal article supplement (doi:10.1039/d0ta05322h), 2020-01-01
Supplement: d0ta05322h1.pdf [file d0ta05322h1.pdf]

**Bimetallic Ni–Pt nanoparticles immobilized on mesoporous N-doped carbon as highly efficient catalysts for complete hydrogen evolution from hydrazine borane**

Wei Wang<sup>[a]</sup>, Xiaoling Hong<sup>[a]</sup>, Qilu Yao<sup>[a]</sup>, Zhang-Hui Lu<sup>\*[a]</sup>

*<sup>a</sup>Institute of Advanced Materials (IAM), College of Chemistry and Chemical Engineering, Jiangxi Normal University, Nanchang, 330022, P.R. China*

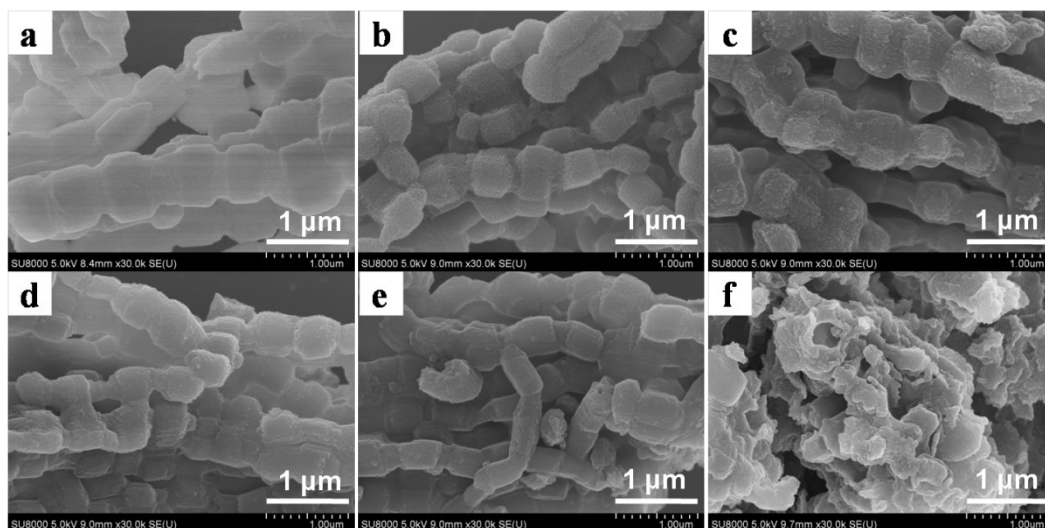

**Figure S1.** SEM images of (a) SBA-15, (b) MNC-500, (c) MNC-600, (d) MNC-700, (e) MNC-800, and (f) MNC-900.

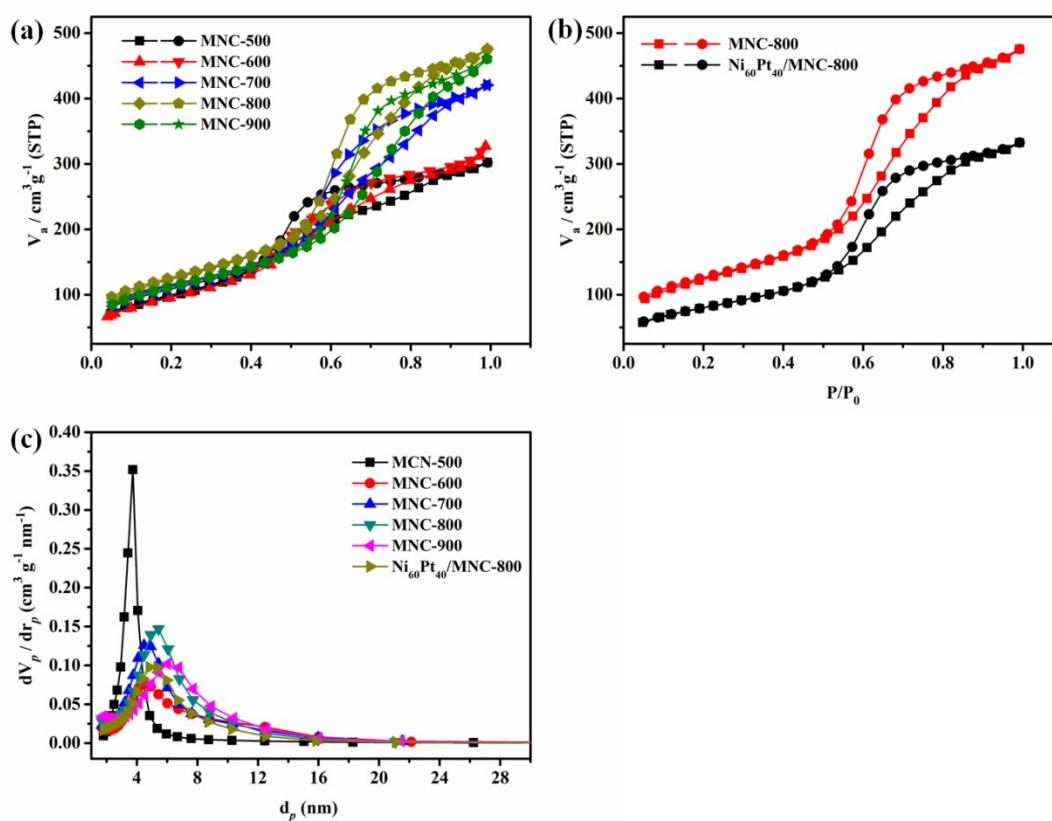

**Figure S2.** Nitrogen adsorption-desorption isotherms of (a) MNC-500, MNC-600, MNC-700, MNC-800, MNC-900, (b)  $\text{Ni}_{60}\text{Pt}_{40}/\text{MNC-800}$ ; (c) the corresponding pore size distribution.

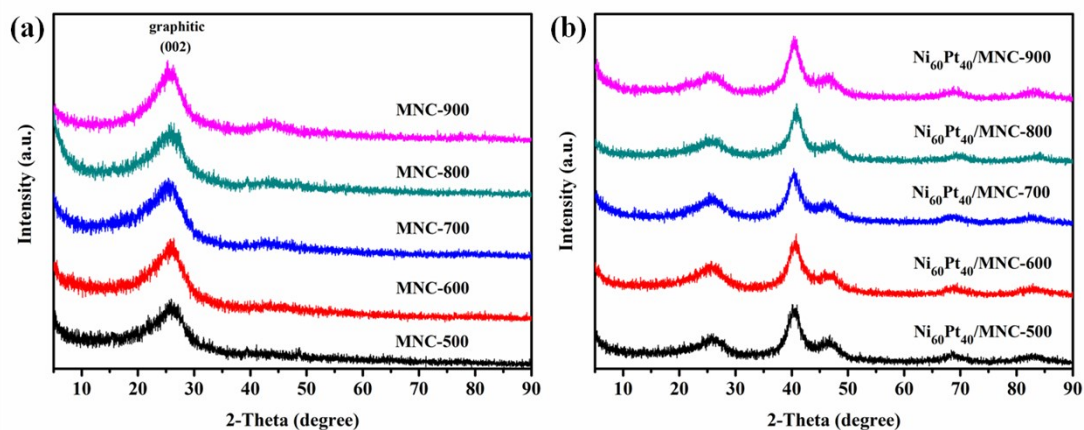

**Figure S3.** XRD patterns of (a) MNC-500, MNC-600, MNC-700, MNC-800, and MNC-900; and (b) Ni<sub>60</sub>Pt<sub>40</sub>/MNC-500, Ni<sub>60</sub>Pt<sub>40</sub>/MNC-600, Ni<sub>60</sub>Pt<sub>40</sub>/MNC-700, Ni<sub>60</sub>Pt<sub>40</sub>/MNC-800, and Ni<sub>60</sub>Pt<sub>40</sub>/MNC-900 NCs.

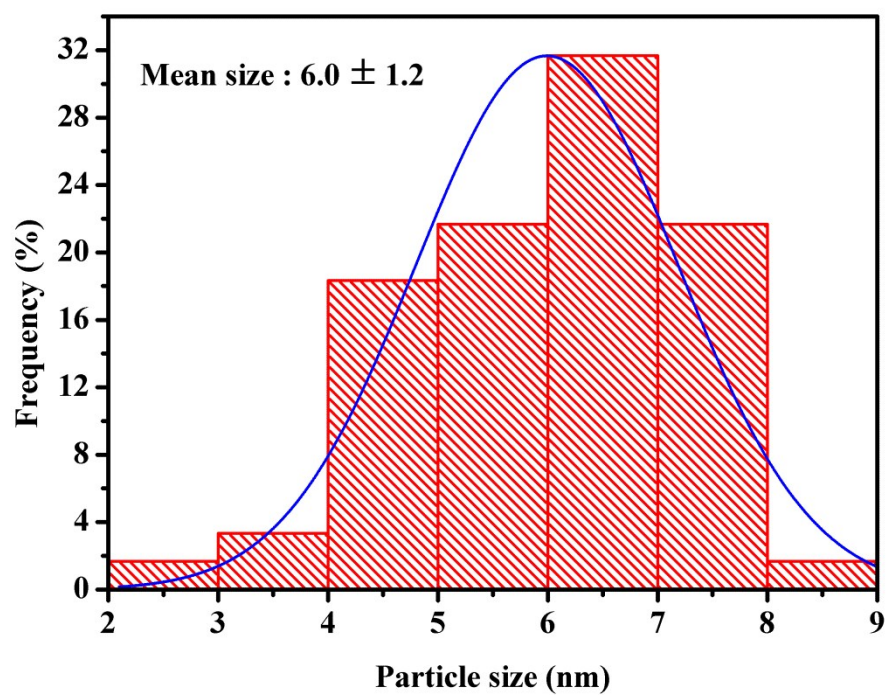

**Figure S4.** The corresponding distribution size histogram of  $\text{Ni}_{60}\text{Pt}_{40}/\text{MNC-800}$ .

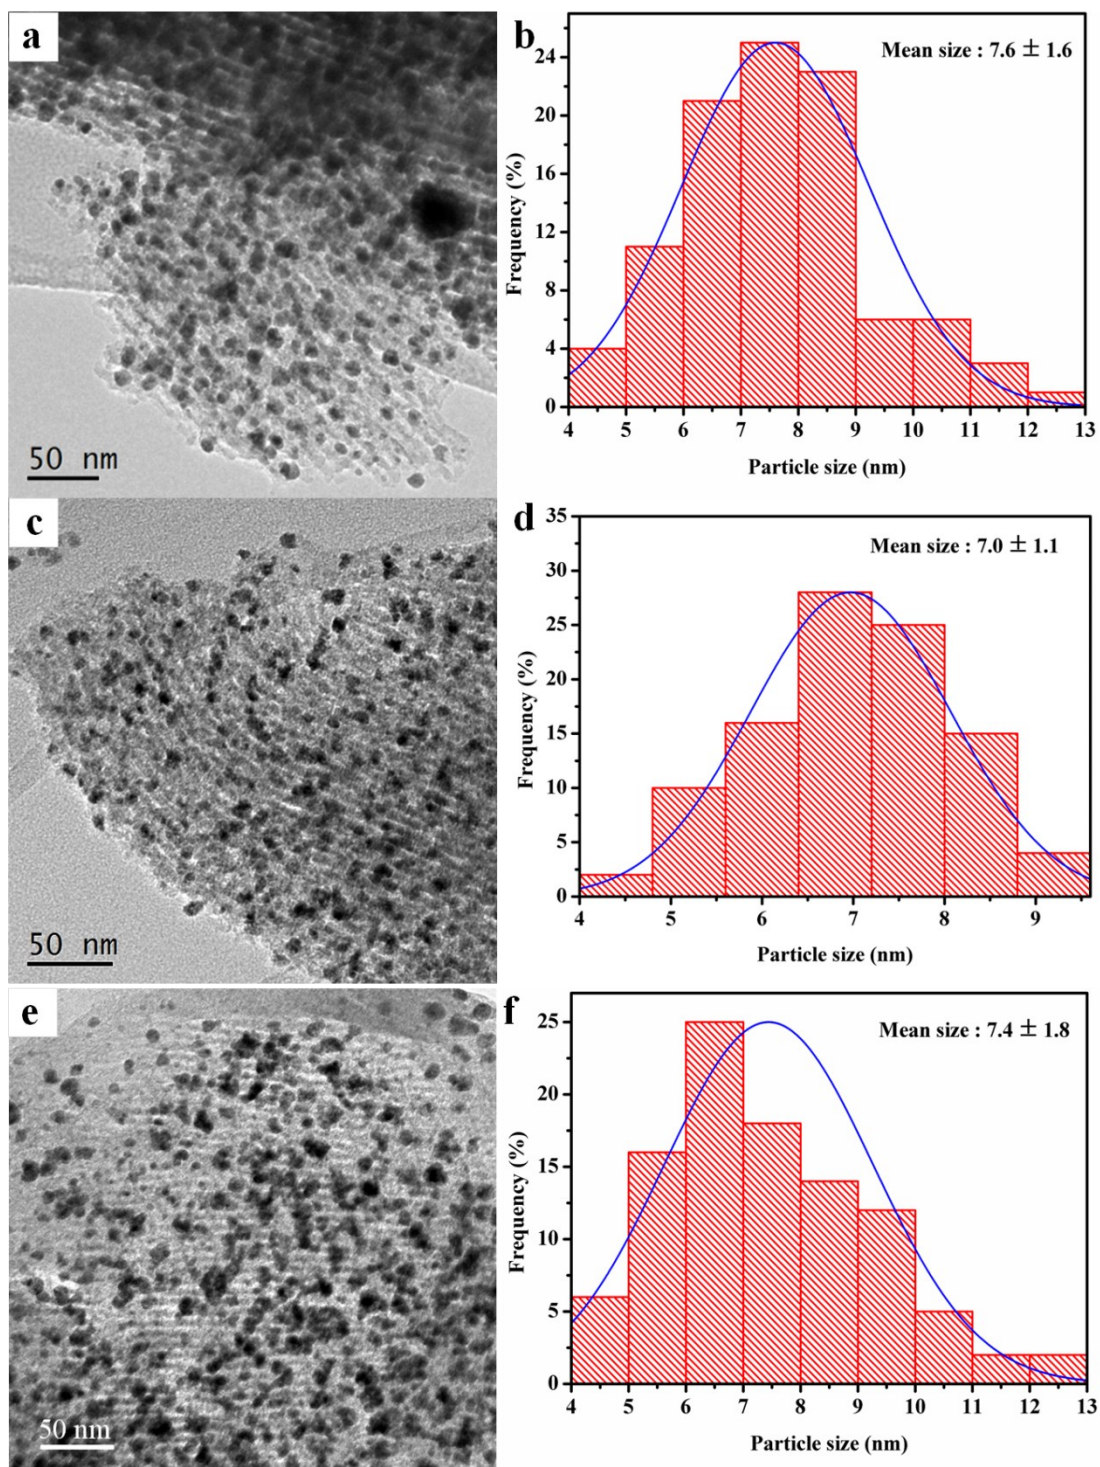

**Figure S5.** Representative TEM images and the corresponding distribution size histograms of (a and b) Ni<sub>60</sub>Pt<sub>40</sub>/MNC-600, (c and d) Ni<sub>60</sub>Pt<sub>40</sub>/MNC-700, and (e and f) Ni<sub>60</sub>Pt<sub>40</sub>/MNC-900.

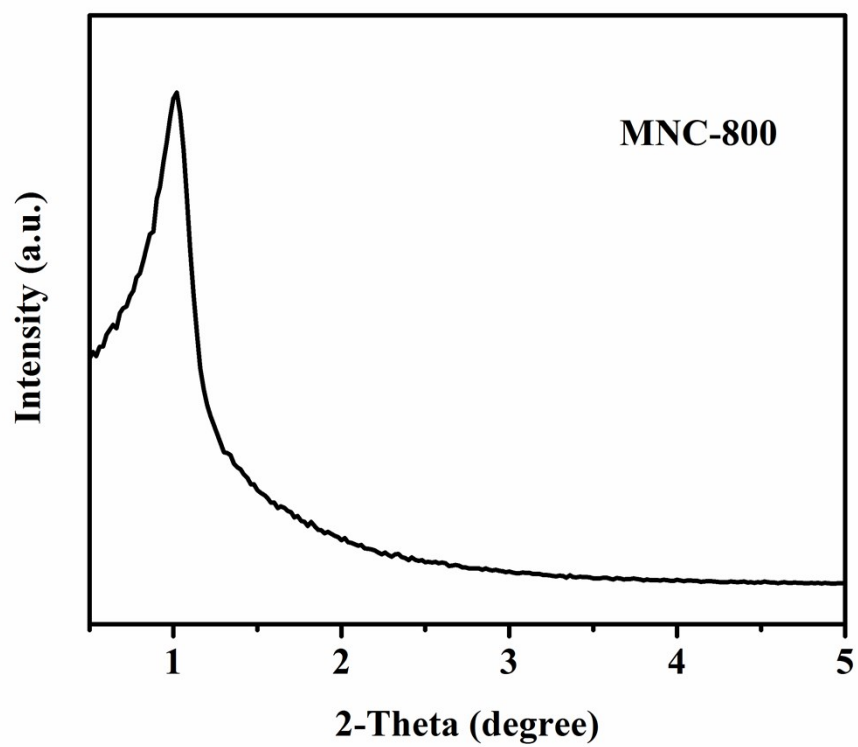

**Figure S6.** Low-angle XRD pattern of MNC-800.

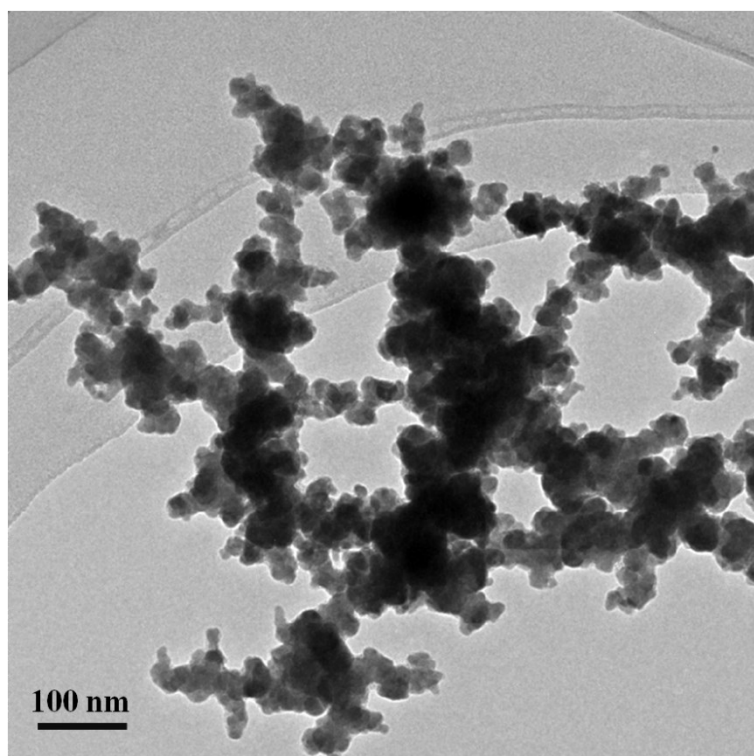

**Figure S7.** Representative TEM image of MNC-free  $\text{Ni}_{60}\text{Pt}_{40}$  NPs.

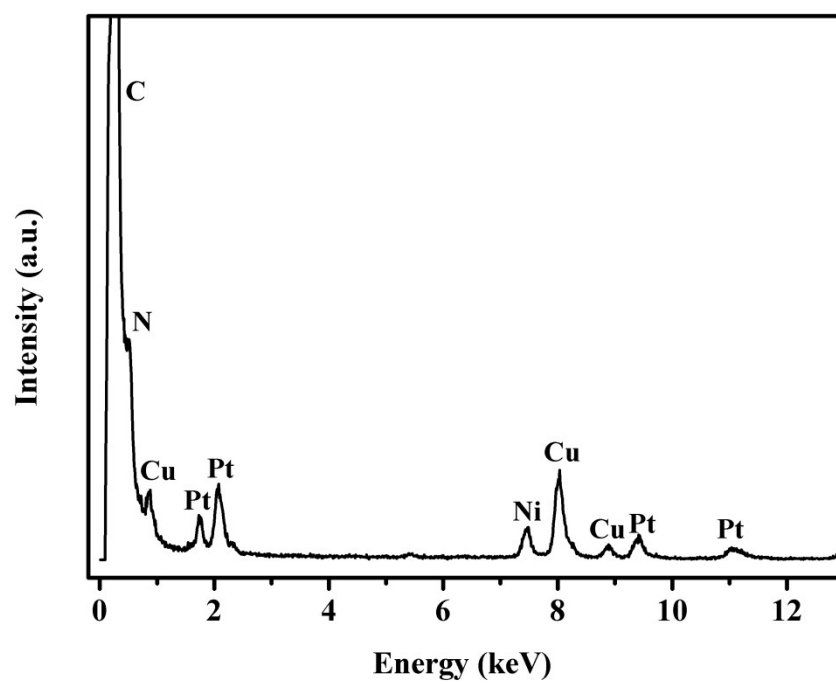

**Figure S8.** EDX spectrum of  $\text{Ni}_{60}\text{Pt}_{40}/\text{MNC-800}$  NCs. The Cu signal originates from Cu grid.

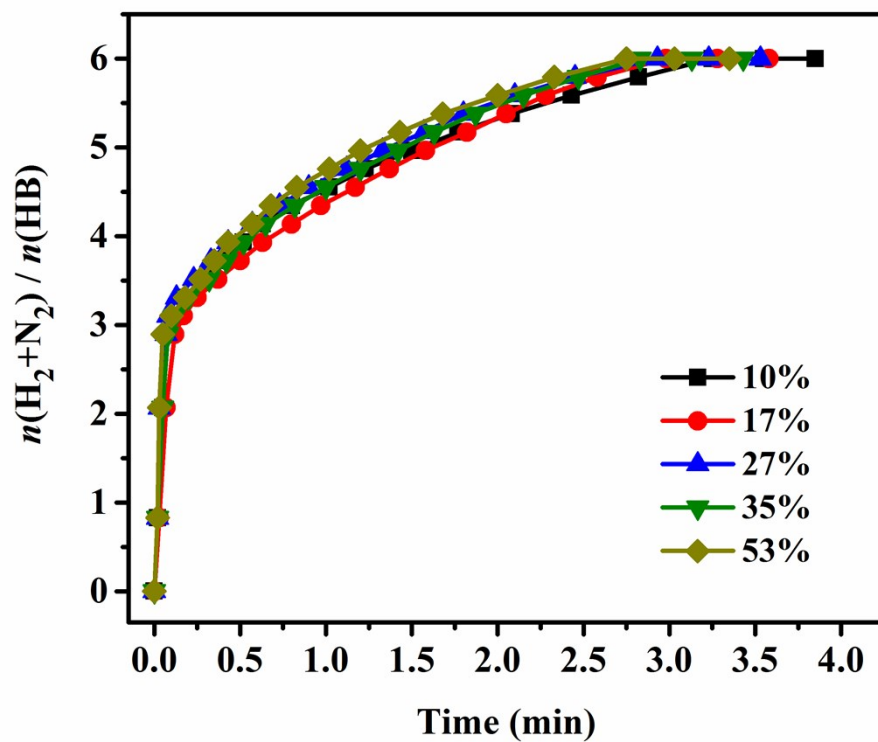

**Figure S9.** Time course plots for hydrogen generation from HB (200 mM, 5 mL) catalyzed by Ni<sub>60</sub>Pt<sub>40</sub>/MNC-800 NCs ( $n_{Pt+Ni}/n_{HB} = 0.1$ ) with different metal loadings at 298 K.

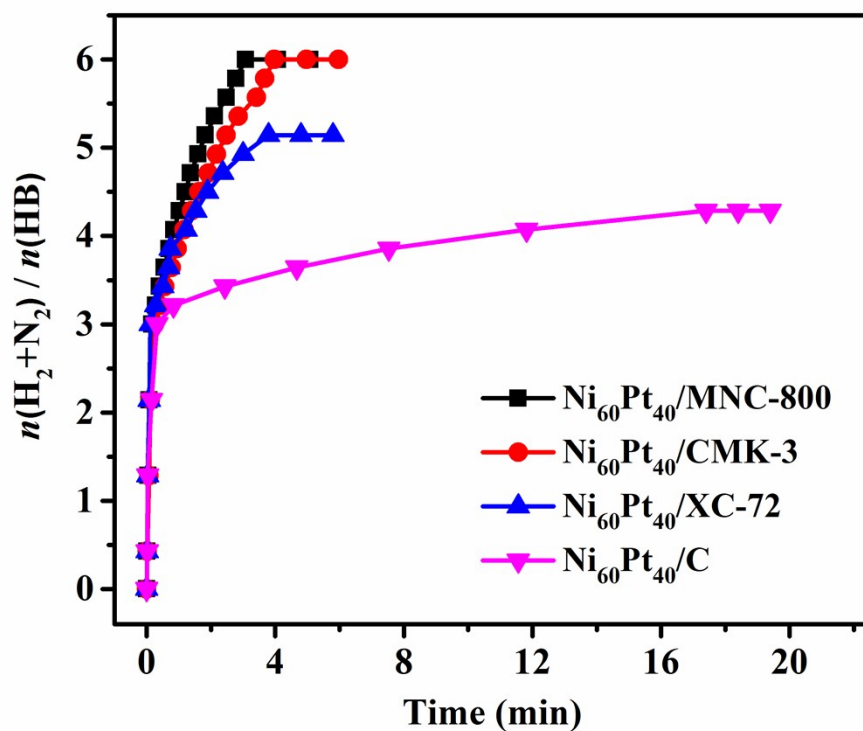

**Figure S10.** Time course plots for hydrogen generation from HB (200 mM, 5 mL) catalyzed by Ni<sub>60</sub>Pt<sub>40</sub>/MNC-800, Ni<sub>60</sub>Pt<sub>40</sub>/CMK-3, Ni<sub>60</sub>Pt<sub>40</sub>/XC-72, and Ni<sub>60</sub>Pt<sub>40</sub>/C NCs ( $n_{\text{Pt+Ni}}/n_{\text{HB}} = 0.1$ ) at 298 K.

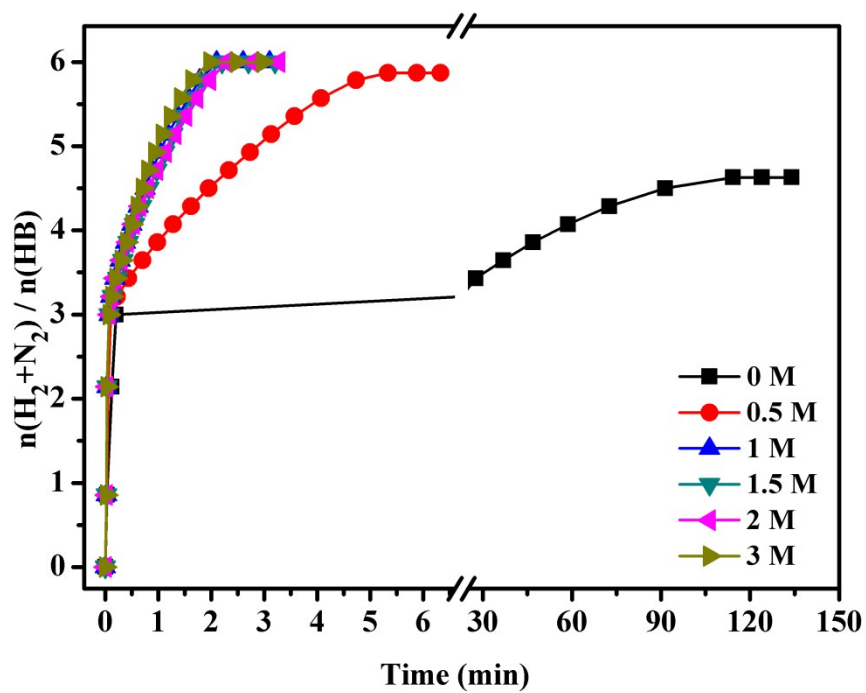

**Figure S11.** Time course plots for hydrogen generation from HB (200 mM, 5 mL) catalyzed by Ni<sub>60</sub>Pt<sub>40</sub>/MNC-800 NCs ( $n_{Pt+Ni}/n_{HB} = 0.1$ ) with different molar concentration of NaOH at 298 K.

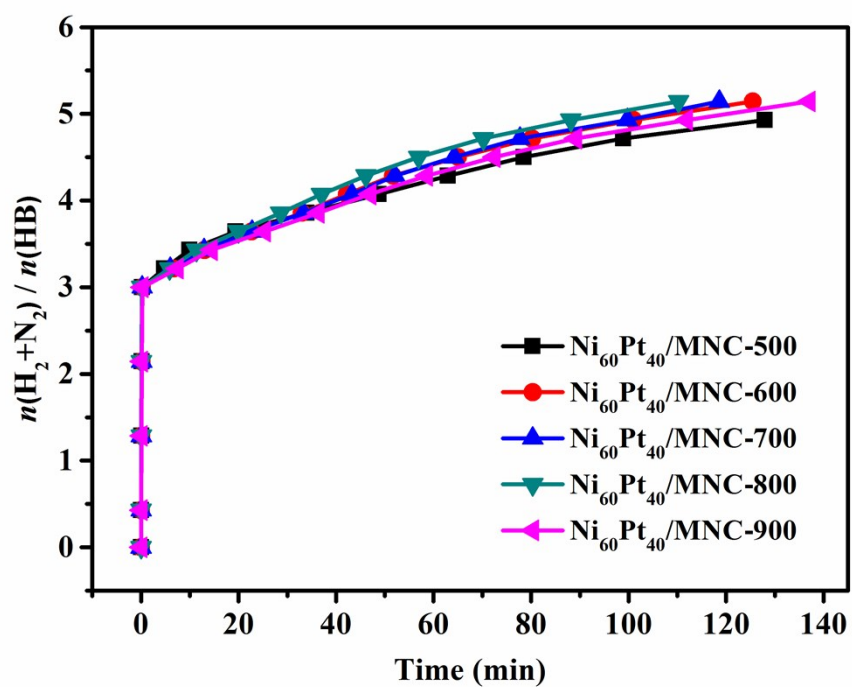

**Figure S12.** Time course plots for hydrogen generation from HB (200 mM, 5 mL) catalyzed by Ni<sub>60</sub>Pt<sub>40</sub>/MNC-500, Ni<sub>60</sub>Pt<sub>40</sub>/MNC-600, Ni<sub>60</sub>Pt<sub>40</sub>/MNC-700, Ni<sub>60</sub>Pt<sub>40</sub>/MNC-800, and Ni<sub>60</sub>Pt<sub>40</sub>/MNC-900 NCs ( $n_{\text{Pt}+\text{Ni}}/n_{\text{HB}} = 0.1$ ) without NaOH at 298 K.

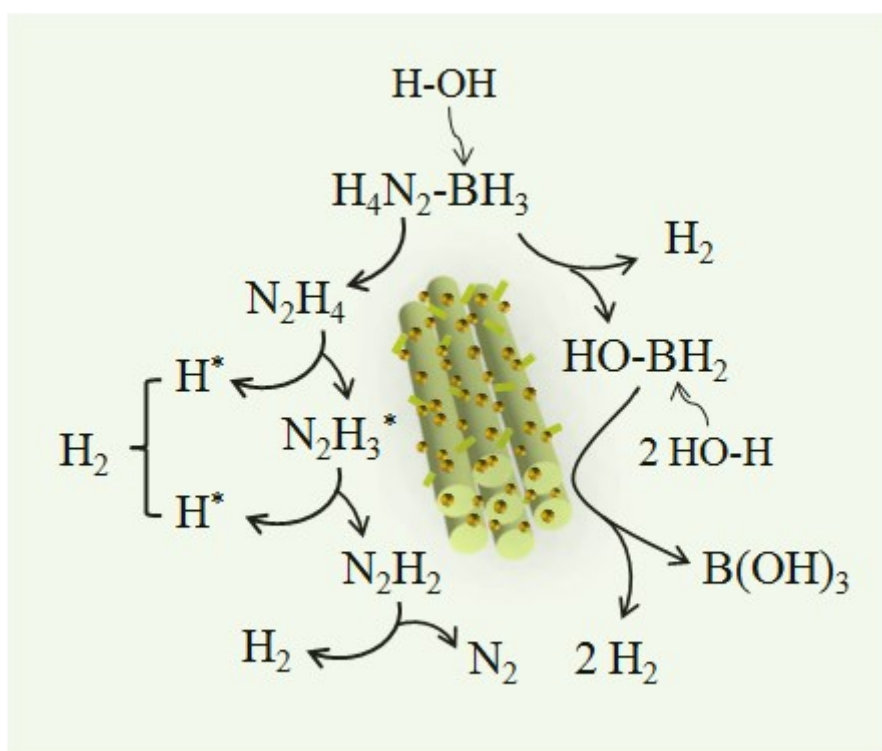

**Figure S13.** Schematic representation of  $\text{H}_2$  generation from HB over  $\text{Ni}_{60}\text{Pt}_{40}/\text{MNC-800}$  catalysts.

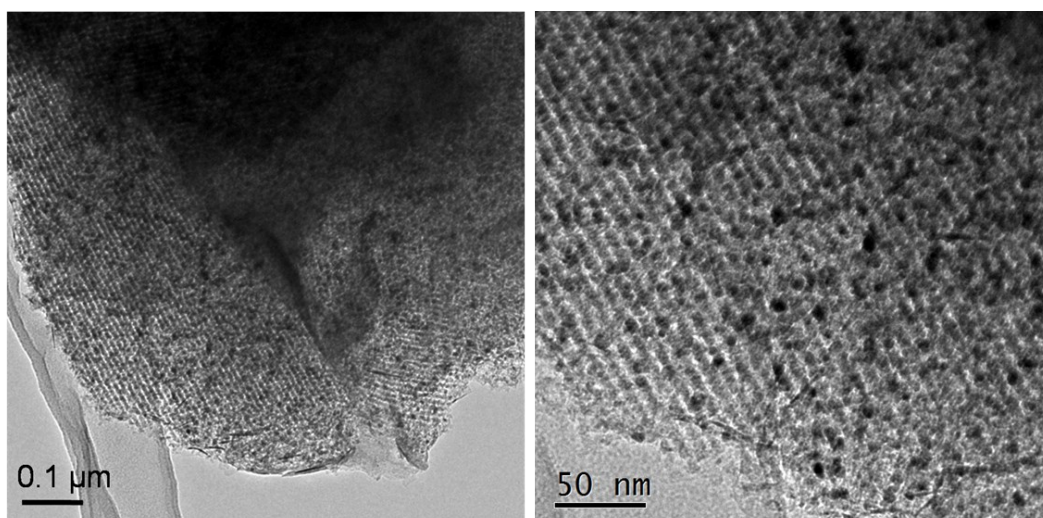

**Figure S14.** TEM images of the  $\text{Ni}_{60}\text{Pt}_{40}/\text{MNC-800}$  NCs after the reusability test.

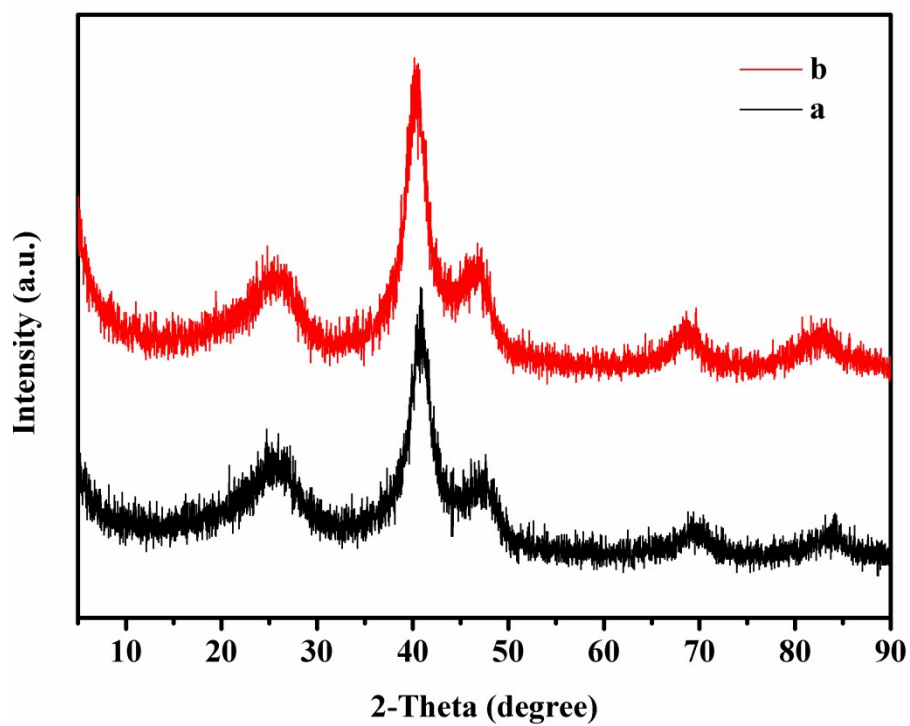

**Figure S15.** Powder XRD patterns of (a) fresh synthesized  $\text{Ni}_{60}\text{Pt}_{40}/\text{MNC-800}$  NCs and (b) the  $\text{Ni}_{60}\text{Pt}_{40}/\text{MNC-800}$  NCs after the durability and reusability test.

**Table S1.** Texture Parameters of MNC-500, MNC-600, MNC-700, MNC-800, MNC-900 and Ni<sub>60</sub>Pt<sub>40</sub>/MNC-800.

| sample                                     | S <sub>BET</sub> (m <sup>2</sup> g <sup>-1</sup> ) | pore volume (cm <sup>3</sup> g <sup>-1</sup> ) | pore size (nm) |
|--------------------------------------------|----------------------------------------------------|------------------------------------------------|----------------|
| MNC-500                                    | 354                                                | 0.47                                           | 4.44           |
| MNC-600                                    | 364                                                | 0.51                                           | 5.56           |
| MNC-700                                    | 385                                                | 0.65                                           | 5.78           |
| MNC-800                                    | 438                                                | 0.74                                           | 5.82           |
| MNC-900                                    | 396                                                | 0.71                                           | 6.49           |
| Ni <sub>60</sub> Pt <sub>40</sub> /MNC-800 | 289                                                | 0.51                                           | 5.78           |

**Table S2.** Element analysis of MNC-500, MNC-600, MNC-700, MNC-800, and MNC-900.

| <b>Sample</b> | <b>N wt%</b> | <b>C wt%</b> | <b>C/N mole ratio</b> |
|---------------|--------------|--------------|-----------------------|
| MNC-500       | 18.46        | 61.70        | 3.85                  |
| MNC-600       | 18.07        | 65.90        | 4.17                  |
| MNC-700       | 13.62        | 71.82        | 6.25                  |
| MNC-800       | 9.75         | 73.02        | 9.09                  |
| MNC-900       | 8.67         | 78.26        | 10.52                 |

**Table S3.** The catalysts composition determined by inductively coupled plasma atomic emission spectroscopic (ICP-AES).

| Catalysts                                                       | Ni<br>(wt%) | Pt<br>(wt%) | Ni/Pt initial<br>composition | Ni/Pt final<br>composition |
|-----------------------------------------------------------------|-------------|-------------|------------------------------|----------------------------|
| Ni/MNC-800                                                      | 9.2         | -           | -                            | -                          |
| Ni <sub>80</sub> Pt <sub>20</sub> /MNC-800                      | 7.0         | 6.1         | 80:20                        | 79:21                      |
| Ni <sub>70</sub> Pt <sub>30</sub> /MNC-800                      | 6.2         | 9.0         | 70:30                        | 69:31                      |
| Ni <sub>60</sub> Pt <sub>40</sub> /MNC-800                      | 5.3         | 11.8        | 60:40                        | 60:40                      |
| Ni <sub>50</sub> Pt <sub>50</sub> /MNC-800                      | 4.3         | 14.4        | 50:50                        | 50:50                      |
| Ni <sub>40</sub> Pt <sub>60</sub> /MNC-800                      | 3.4         | 16.9        | 40:60                        | 40:60                      |
| Ni <sub>30</sub> Pt <sub>70</sub> /MNC-800                      | 2.5         | 19.4        | 30:70                        | 30:70                      |
| Pt/MNC-800                                                      | -           | 26.2        | -                            | -                          |
| Ni <sub>60</sub> Pt <sub>40</sub>                               | 31.6        | 68.4        | 60:40                        | 61:39                      |
| Ni <sub>60</sub> Pt <sub>40</sub> /MNC-800<br>after five cycles | 5.2         | 11.7        | 60:40                        | 60:40                      |

**Table S4.** The relationship between the performance of the catalyst and the C/N mole ratio and the mean particle size of the metal particles.

| <b>Sample</b>                              | <b>C/N mole<br/>ratio</b> | <b>Mean particle<br/>size / nm</b> | <b>TOF / h<sup>-1</sup><br/>(298K)</b> |
|--------------------------------------------|---------------------------|------------------------------------|----------------------------------------|
| Ni <sub>60</sub> Pt <sub>40</sub> /MNC-600 | 4.17                      | 7.6                                | 508                                    |
| Ni <sub>60</sub> Pt <sub>40</sub> /MNC-700 | 6.25                      | 7.0                                | 882                                    |
| Ni <sub>60</sub> Pt <sub>40</sub> /MNC-800 | 9.09                      | 6.0                                | 1111                                   |
| Ni <sub>60</sub> Pt <sub>40</sub> /MNC-900 | 10.52                     | 7.4                                | 857                                    |

**Calculation method for *TOF*:**

The total turnover frequency (*TOF*) reported in this work is an apparent *TOF* value based on the number of metal atoms in catalyst, which is calculated from the equation as follow:

$$TOF = \frac{n_{H_2}}{n_{metal} \times t}$$

Where  $n_{H_2}$  is the mole number of generated  $H_2$ ,  $n_{metal}$  is the mole number of metal (Ni and Pt) in catalyst and  $t$  is the completed reaction time in hour.
